# Supplementary material
Source: publisher site journal article supplement (https://www.dovepress.com/article/432747)
Supplement: Supplementary file 1 [file get_supplementary_file.php]

**Supplementary Experimental Procedures**

**Supplementary Table 1.** The number of reads per sample pre- and post-rarefaction

| **Sample ID** | **Group** | **Filtered reads** | **Rarefied reads** |
| --- | --- | --- | --- |
| A1 | Control | 19217 | 19217 |
| A2 | Control | 26424 | 19217 |
| A3 | Control | 32238 | 19217 |
| A4 | Control | 21884 | 19217 |
| A5 | Control | 20416 | 19217 |
| A6 | Control | 28153 | 19217 |
| A7 | Control | 27522 | 19217 |
| A8 | Control | 32161 | 19217 |
| B1 | IAld | 21024 | 19217 |
| B2 | IAld | 24095 | 19217 |
| B3 | IAld | 23250 | 19217 |
| B4 | IAld | 22818 | 19217 |
| B5 | IAld | 22921 | 19217 |
| B6 | IAld | 19853 | 19217 |
| B7 | IAld | 24117 | 19217 |
| B8 | IAld | 21110 | 19217 |
| C1 | DSS | 22745 | 19217 |
| C2 | DSS | 22938 | 19217 |
| C3 | DSS | 24321 | 19217 |
| C4 | DSS | 27269 | 19217 |
| C5 | DSS | 30095 | 19217 |
| C6 | DSS | 28904 | 19217 |
| C7 | DSS | 26717 | 19217 |
| C8 | DSS | 24598 | 19217 |
| D1 | DSS+IAld | 25714 | 19217 |
| D2 | DSS+IAld | 25171 | 19217 |
| D3 | DSS+IAld | 27086 | 19217 |
| D4 | DSS+IAld | 21433 | 19217 |
| D5 | DSS+IAld | 21407 | 19217 |
| D6 | DSS+IAld | 23332 | 19217 |
| D7 | DSS+IAld | 28847 | 19217 |
| D8 | DSS+IAld | 29030 | 19217 |
| E1 | CH-22 | 30545 | 19217 |
| E2 | CH-22 | 40231 | 19217 |
| E3 | CH-22 | 21100 | 19217 |
| E4 | CH-22 | 32514 | 19217 |
| E5 | CH-22 | 25853 | 19217 |
| E6 | CH-22 | 31243 | 19217 |
| E7 | CH-22 | 25629 | 19217 |
| E8 | CH-22 | 21423 | 19217 |

**Supplementary Table 2.** The primer sequence used in this study.

| **Gene** | **Forward** | **Reverse** |
| --- | --- | --- |
| Human *Cyp1a1* | GTGATCCCAGGCTCCAAGAG | AGAAGAAACTCCGTGGCCG |
| Human *Cyp1b1* | AACGTACCGGCCACTATCAC | GCACTCGAGTCTGCACATCA |
| Human*β-actin* | CCACGAAACTACCTTCAACTCC | CGTGATCTCCTTCTGCATCCTG |
| Mouse *Cyp1a1* | TGGAGCCTCATGTACCTGGTAACC | CTGCCGATCTCTGCCAATCACTG |
| Mouse *Cyp1b1* | CGTGGTGGTGCTGAATGGAGAG | AGAGTAGTGACCGAACGCCAGAC |
| Mouse *β-actin* | CTCCCGAGCTGGATACAGATTAAG | AGAGGTCTTTACGGATGTCAACGT |


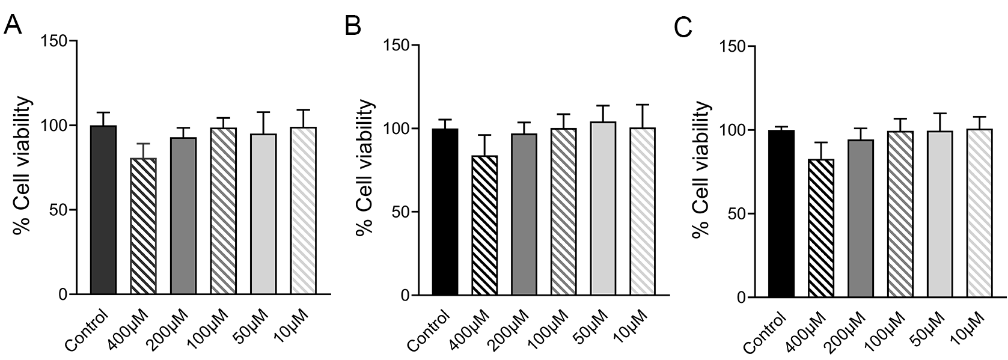


**Supplementary** **Figure 1.** IAld showed no cytotoxic effects on the indicated cells. (A) RAW264.7 (B) THP-1 (C) Caco-2 cells were treated with IAld at concentrations of 400, 200, 100, 50, 10 μM for 48 h. Cytotoxicity is expressed as % of viable cells relative to the negative control. The data are shown as the mean ± SEM [n = 3].


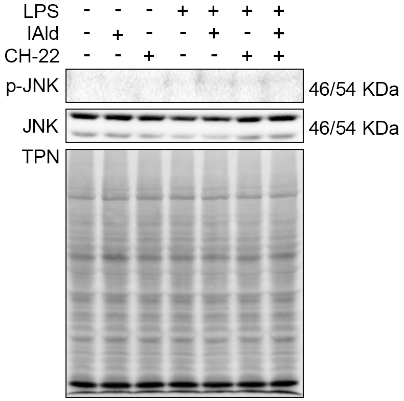


**Supplementary Figure 2.** LPS or other treatments failed to induce the phosphorylation of JNK pathway in Caco-2 cells. Polarized Caco-2 cells were treated with IAld (200 uM) for 1 h with or without 1 h prior treatment of CH-22 (10 μM), followed by LPS (100 ng/ml) stimulation for 4 h. The levels of phosphorylated JNK were determined by immunoblot. Total protein was a loading control.
